# Supplementary material for: Excess mortality in England and Wales during the first wave of the COVID-19 pandemic
Source: PubMed Central journal article supplement (PMC7892396; doi:10.1136/jech-2020-214764), 2020-10-15

# Appendix 1 to excess mortality in England and Wales during the 2020 COVID19 pandemic

Evangelos Kontopantelis  
Mamas A Mamas  
John Deanfield  
Miqdad Asaria  
Tim Doran

October 7, 2020

## Contents

|                                                                                                   |          |
|---------------------------------------------------------------------------------------------------|----------|
| <b>1 All-cause excess deaths, from 2020 week 1</b>                                                | <b>2</b> |
| <b>2 All-cause minus COVID-19 related excess deaths, from 2020 week 1</b>                         | <b>4</b> |
| <b>3 All-cause excess deaths, per 100,000 population, from 2020 week 1</b>                        | <b>6</b> |
| <b>4 All-cause excess deaths minus COVID-19 related, per 100,000 population, from 2020 week 1</b> | <b>8</b> |

# 1 All-cause excess deaths, from 2020 week 1

Figure 1: All-cause excess deaths, by region

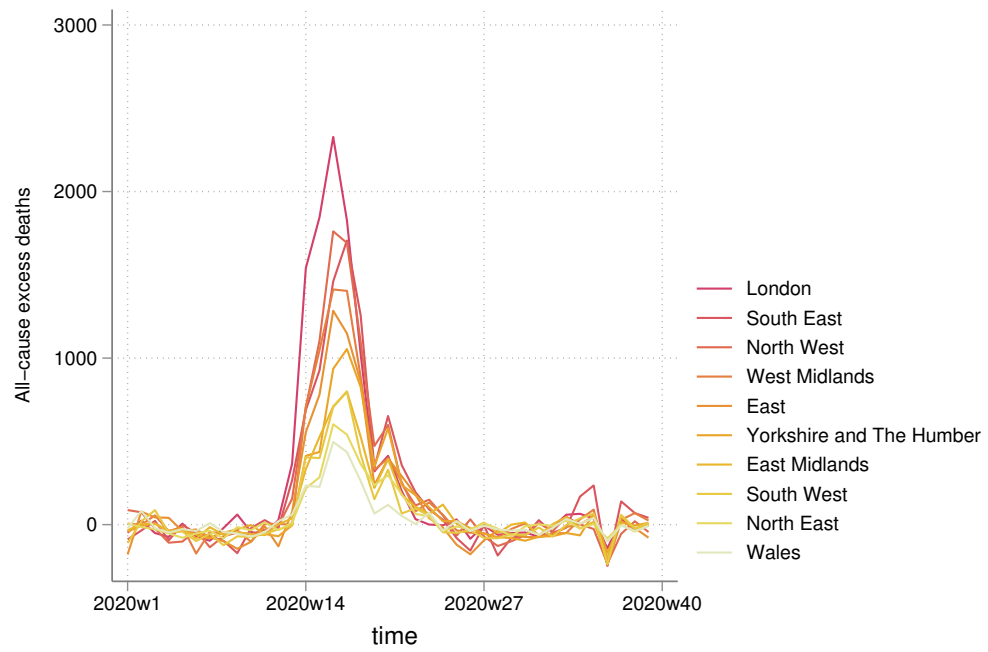

Figure 2: All-cause excess deaths, by age group

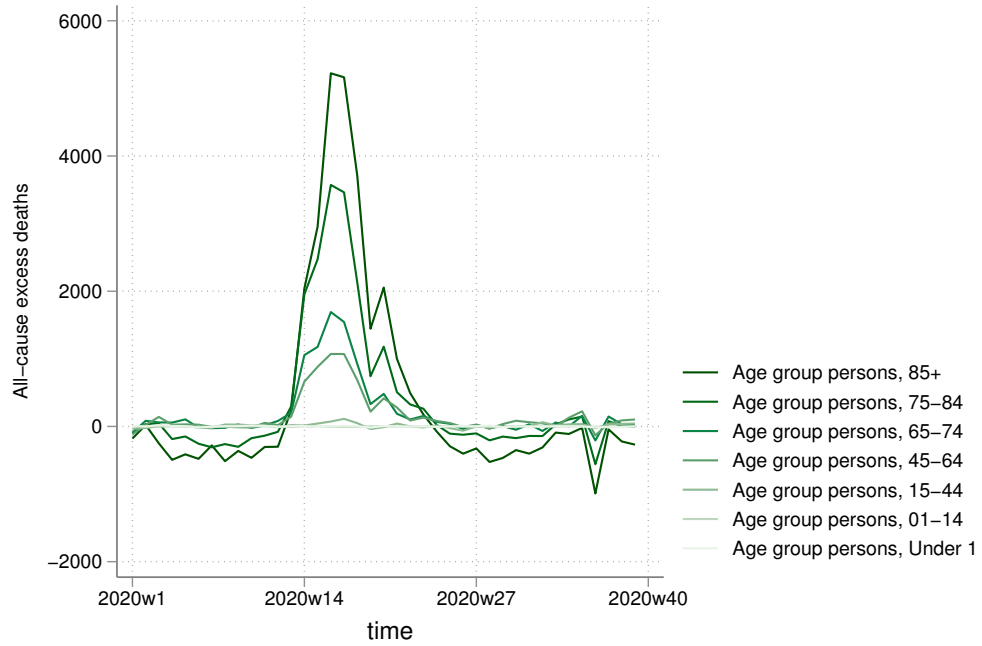

Figure 3: All-cause excess deaths, by age group and sex

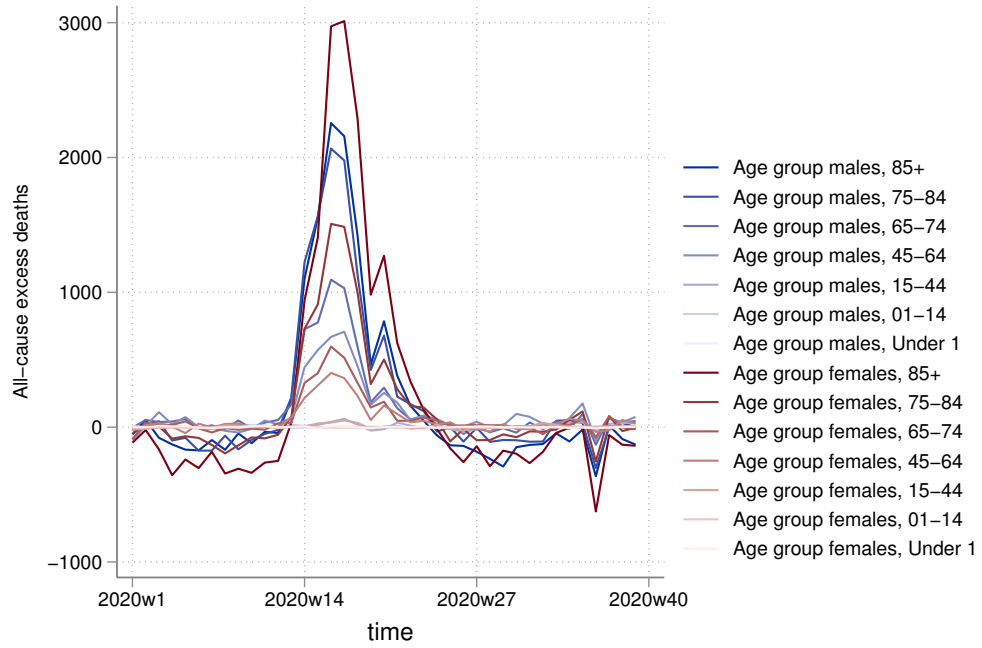

## 2 All-cause minus COVID-19 related excess deaths, from 2020 week 1

Figure 4: All-cause minus COVID-19 excess deaths, by region

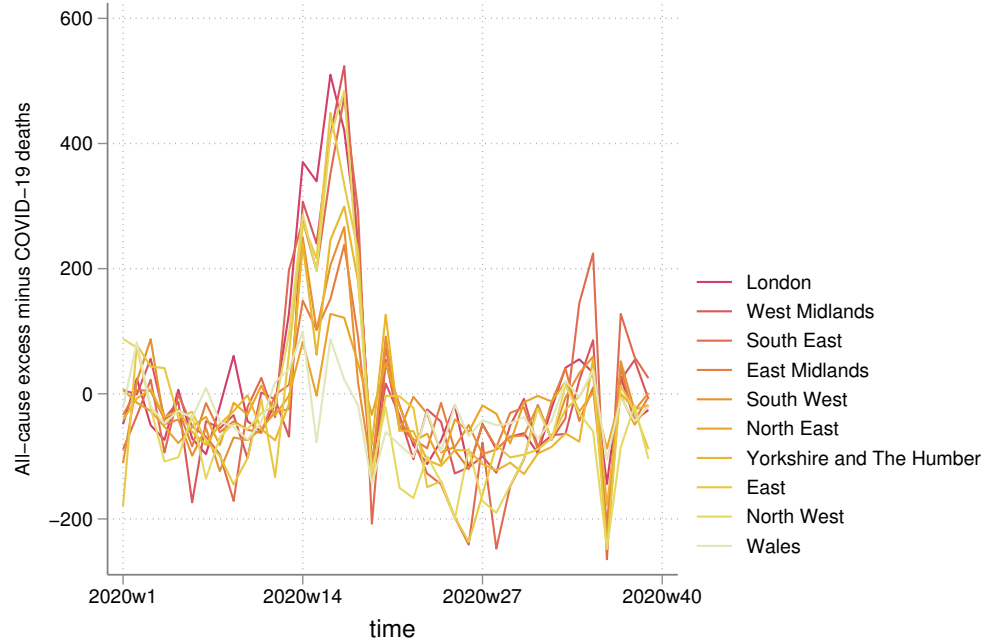

Figure 5: All-cause minus COVID-19 excess deaths, by age group

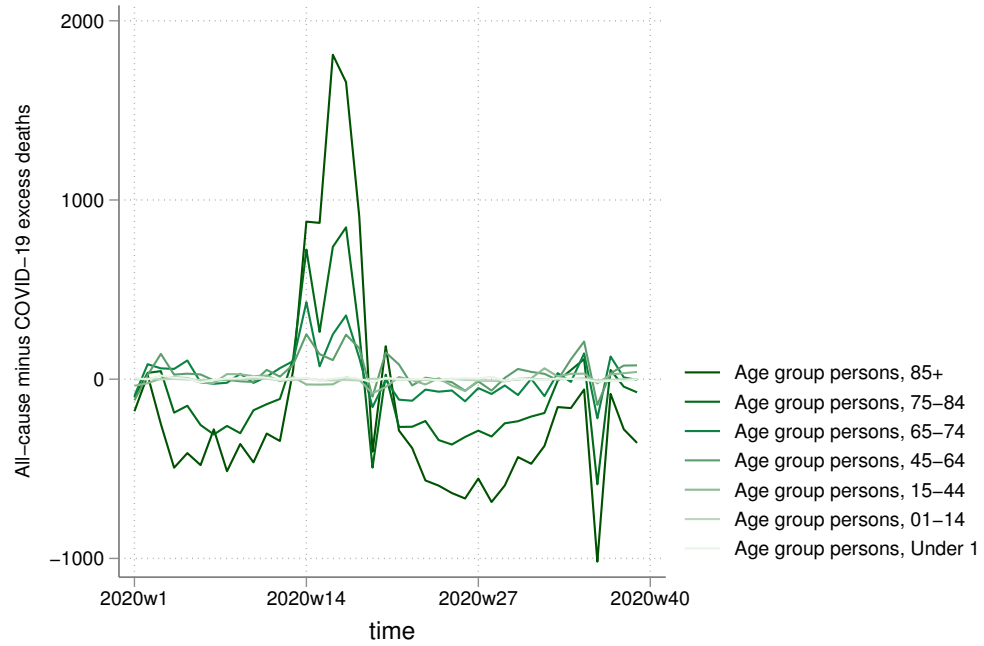

Figure 6: All-cause minus COVID-19 excess deaths, by age group and sex

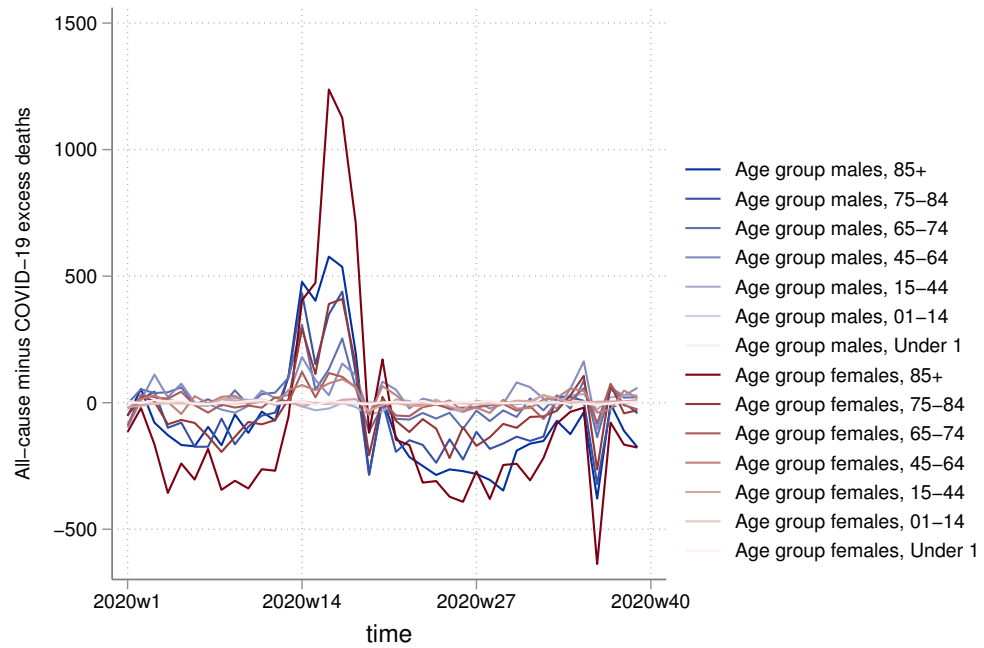

### 3 All-cause excess deaths, per 100,000 population, from 2020 week 1

Figure 7: All-cause excess deaths per 100k, by region

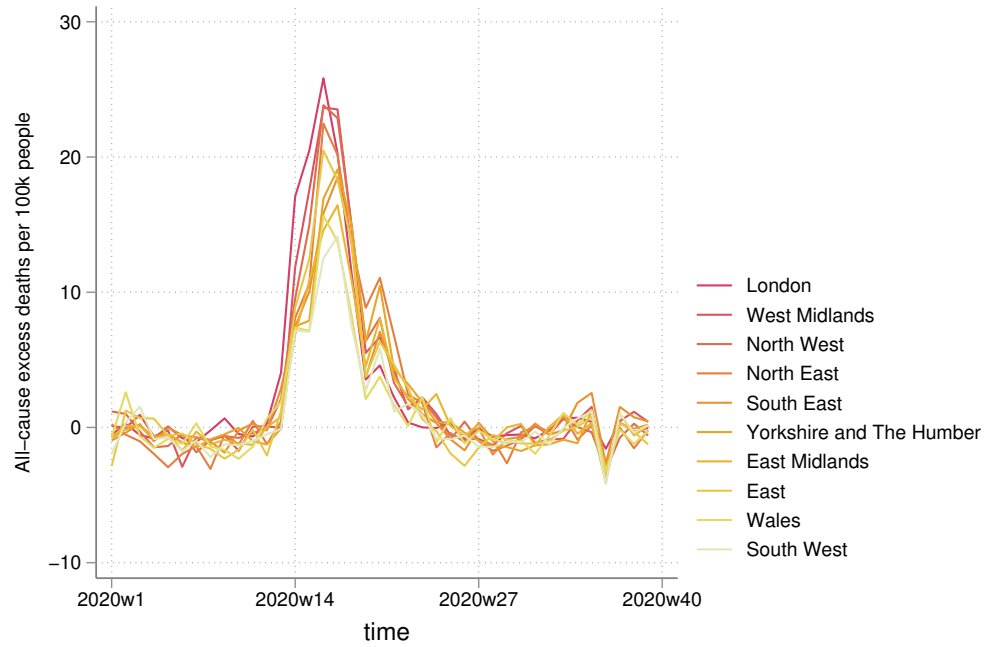

Figure 8: All-cause excess deaths per 100k, by age group

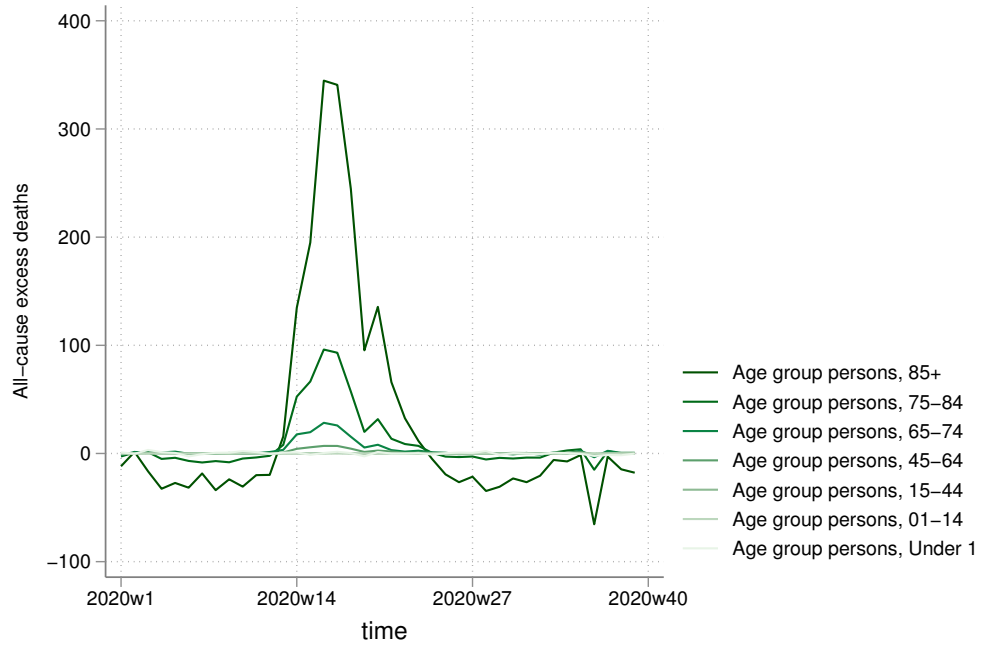

Figure 9: All-cause excess deaths per 100k, by age group and sex

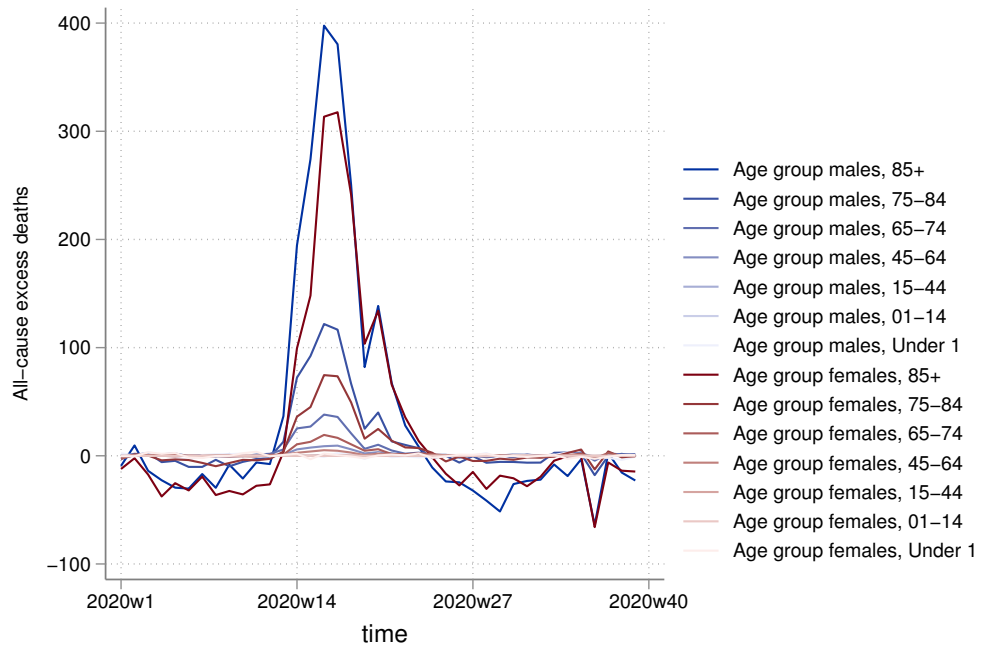

#### 4 All-cause excess deaths minus COVID-19 related, per 100,000 population, from 2020 week 1

Figure 10: All-cause minus COVID-19 excess deaths per 100k, by region

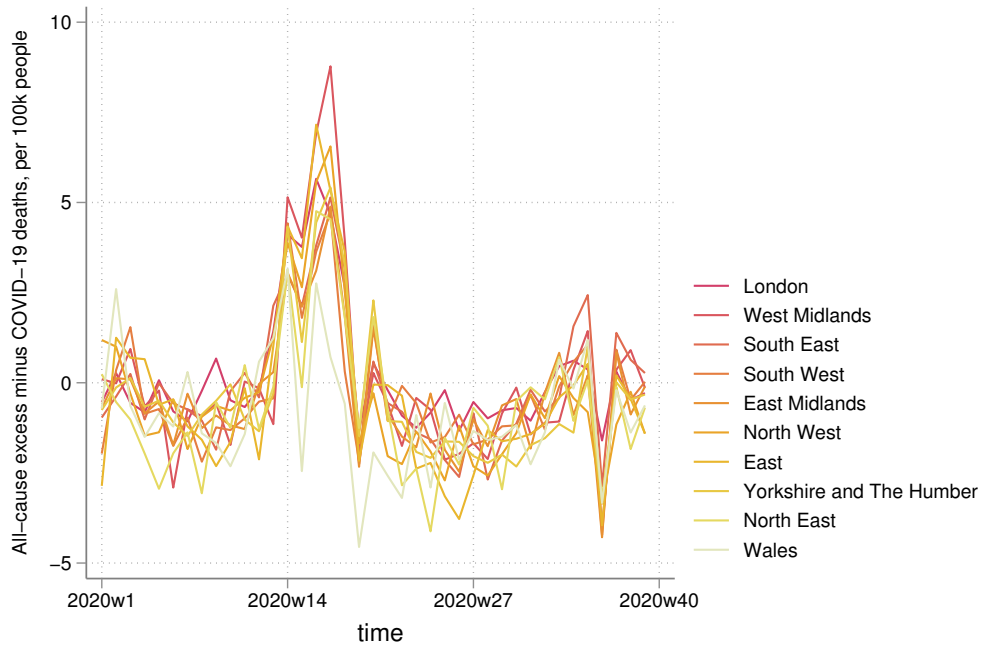



Figure 11: All-cause minus COVID-19 excess deaths per 100k, by age group

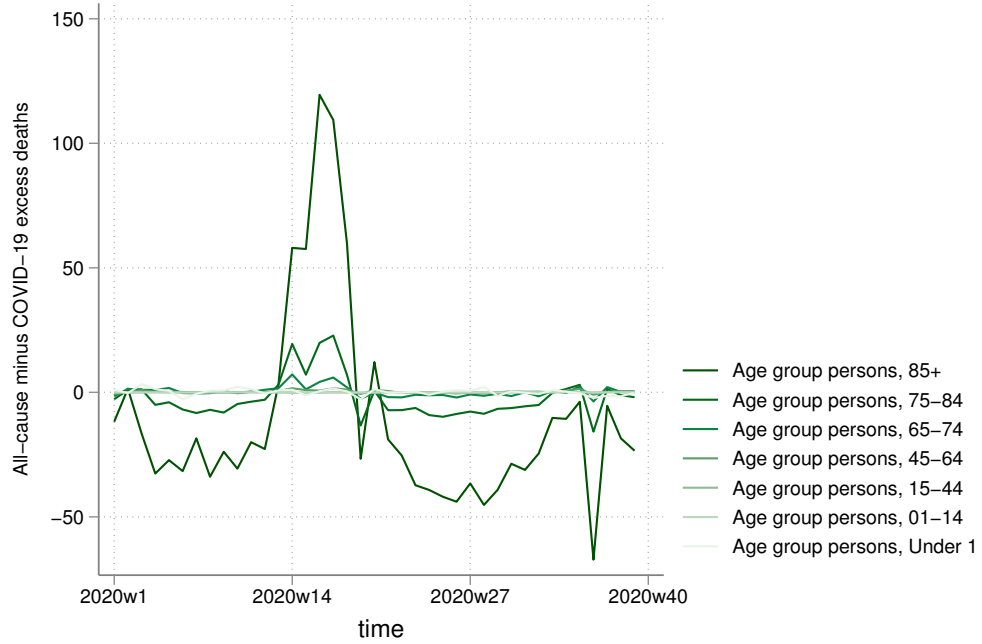

Figure 12: All-cause minus COVID-19 excess deaths per 100k, by age group and sex

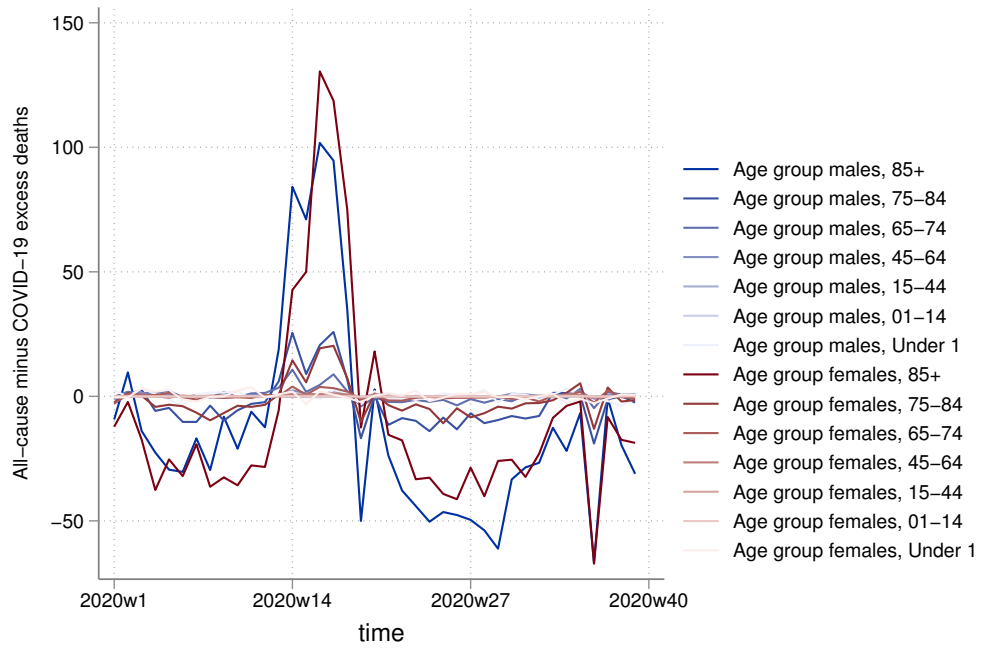

Supplement: appendix1.pdf [file appendix1.pdf]
